# Supplementary material
Source: HighWire-hosted journal article supplement (https://sti.bmj.com/content/93/2/137)
Supplement: inline-supplementary-material-1 [file inline-supplementary-material-1.pdf]

## Web Appendix

- w1. Health Mo. Integrating the management of STIs/RTI into reproductive health services In: (NASCOP) NASCP, ed. Nairobi, Kenya 2010.
- w2. World Health Organization. Guidelines for the Management of Sexually Transmitted Infections. Geneva, Switzerland: WHO Library Cataloguing-in-Publication Data, Revised 2003.
- w3. Unger JA, Matemo D, Pintye J, et al. Patient-Delivered Partner Treatment for Chlamydia, Gonorrhea, and Trichomonas Infection Among Pregnant and Postpartum Women in Kenya. *Sex Transm Dis* 2015;**42**(11):637-42.
- w4. Riley DE, Roberts MC, Takayama T, et al. Development of a polymerase chain reaction-based diagnosis of *Trichomonas vaginalis*. *J Clin Microbiol* 1992;**30**(2):465-72.
- w5. Hegazy MM, El-Tantawy NL, Soliman MM, et al. Performance of rapid immunochromatographic assay in the diagnosis of Trichomoniasis vaginalis. *Diagn Microbiol Infect Dis* 2012;**74**(1):49-53.
- w6. Huppert JS, Batteiger BE, Braslins P, et al. Use of an immunochromatographic assay for rapid detection of *Trichomonas vaginalis* in vaginal specimens. *J Clin Microbiol* 2005;**43**(2):684-7.
- w7. Gray R, Wawer M, Thoma M, et al. Male circumcision and the risks of female HIV and sexually transmitted infections acquisition in Rakai, Uganda (abstract #128). Denver, CO: 13th Conference on Retroviruses and Opportunistic Infections;, 2006.
- w8. Castellsague X, Peeling RW, Franceschi S, et al. Chlamydia trachomatis infection in female partners of circumcised and uncircumcised adult men. *Am J Epidemiol* 2005;**162**(9):907-16.
- w9. Davis MA, Gray RH, Grabowski MK, et al. Male circumcision decreases high-risk human papillomavirus viral load in female partners: a randomized trial in Rakai, Uganda. *Int J Cancer* 2013;**133**(5):1247-52.

- w10. Wawer MJ, Tobian AA, Kigozi G, et al. Effect of circumcision of HIV-negative men on transmission of human papillomavirus to HIV-negative women: a randomised trial in Rakai, Uganda. *Lancet* 2011;**377**(9761):209-18.
- w11. Turner AN, Morrison CS, Padian NS, et al. Male circumcision and women's risk of incident chlamydial, gonococcal and trichomonal infections. *Sex Transm Dis* 2008;**35**(7):689-95.
- w12. Tobian AA, Kigozi G, Redd AD, et al. Male circumcision and herpes simplex virus type 2 infection in female partners: a randomized trial in Rakai, Uganda. *J Infect Dis* 2012;**205**(3):486-90.
- w13. Pintye J, Baeten JM, Manhart LE, et al. Association between male circumcision and incidence of syphilis in men and women: a prospective study in HIV-1 serodiscordant heterosexual African couples. *Lancet Glob Health* 2014;**2**(11):e664-71.
- w14. O'Farrell N, Morison L, Moodley P, et al. Association between HIV and subpreputial penile wetness in uncircumcised men in South Africa. *J Acquir Immune Defic Syndr* 2006;**43**(1):69-77.
- w15. Peterman TA, Tian LH, Metcalf CA, et al. High incidence of new sexually transmitted infections in the year following a sexually transmitted infection: a case for rescreening. *Ann Intern Med* 2006;**145**(8):564-72.
- w16. Masese L, Baeten JM, Richardson BA, et al. Incidence and correlates of Chlamydia trachomatis infection in a high-risk cohort of Kenyan women. *Sex Transm Dis* 2013;**40**(3):221-5.
- w17. Francis SC, Ao TT, Vanobberghen FM, et al. Epidemiology of Curable Sexually Transmitted Infections among Women at Increased Risk for HIV in Northwestern Tanzania: Inadequacy of Syndromic Management. *PLoS One* 2014;**9**(7).
- w18. Mugweni E, Omar M, Pearson S. Understanding barriers to safer sex practice in Zimbabwean marriages: implications for future HIV prevention interventions. *Health Educ Res* 2015;**30**(3):388-99.

- w19. Workowski KA, Bolan GA. Sexually transmitted diseases treatment guidelines, 2015. MMWR Recomm Rep 2015;**64**(Rr-03):1-137.
- w20. Crucitti T, Jespers V, Mulenga C, et al. Trichomonas vaginalis is highly prevalent in adolescent girls, pregnant women, and commercial sex workers in Ndola, Zambia. Sex Transm Dis 2010;**37**(4):223-7.
- w21. Palanee-Phillips T, Schwartz K, Brown ER, et al. Characteristics of Women Enrolled into a Randomized Clinical Trial of Dapivirine Vaginal Ring for HIV-1 Prevention. PLoS One 2015;**10**(6):e0128857.
- w22. Sappenfield E, Jamieson DJ, Kourtis AP. Pregnancy and susceptibility to infectious diseases. Infect Dis Obstet Gynecol 2013;**2013**:752852.
- w23. Koss CA, Baras DC, Lane SD, et al. Investigation of metronidazole use during pregnancy and adverse birth outcomes. Antimicrob Agents Chemother 2012;**56**(9):4800-5.
- w24. Mann JR, McDermott S, Zhou L, et al. Treatment of trichomoniasis in pregnancy and preterm birth: an observational study. J Womens Health (Larchmt) 2009;**18**(4):493-7.
- w25. Saleh AM, Abdalla HS, Satti AB, et al. Diagnosis of Trichomonous vaginalis by microscopy, latex agglutination, diamond's media, and PCR in symptomatic women, Khartoum, Sudan. Diagn Pathol 2014;**9**:49.
- w26. Hewett PC, Haberland N, Apicella L, et al. The (mis)reporting of male circumcision status among men and women in Zambia and Swaziland: a randomized evaluation of interview methods. PLoS One 2012;**7**(5):e36251.
- w27. Kong X, Ndyababo A, Nalugoda F, et al. The accuracy of women's reports of their partner's male circumcision status in Rakai, Uganda. Aids 2013;**27**(4):662-4.
